# Supplementary material for: Role of mesoporosity in cellulose fibers for paper-based fast electrochemical energy storage
Source: Royal Society of Chemistry journal article supplement (doi:10.1039/c3ta10972k), 2013-01-01
Supplement: c3ta10972k.pdf [file c3ta10972k.pdf]

# Role of Mesoporosity in Cellulose Fiber for Paper-Based Fast Electrochemical Energy Storage

Xinyi Chen,<sup>1,2†</sup> Hongli Zhu,<sup>1†</sup> Chanyuan Liu,<sup>1,2</sup> Yu-Chen Chen,<sup>1</sup> Nicholas Weadock<sup>1</sup>, Gary Rubloff,<sup>1,2</sup> Liangbing Hu<sup>1\*</sup>

1. Department of Materials Science and Engineering, University of Maryland, College Park, MD 20742 USA

2. Institute for Systems Research, University of Maryland, College Park, MD 20742 USA

<sup>†</sup>Equal contribution

\*Email: [binghu@umd.edu](mailto:binghu@umd.edu)

## Supporting materials

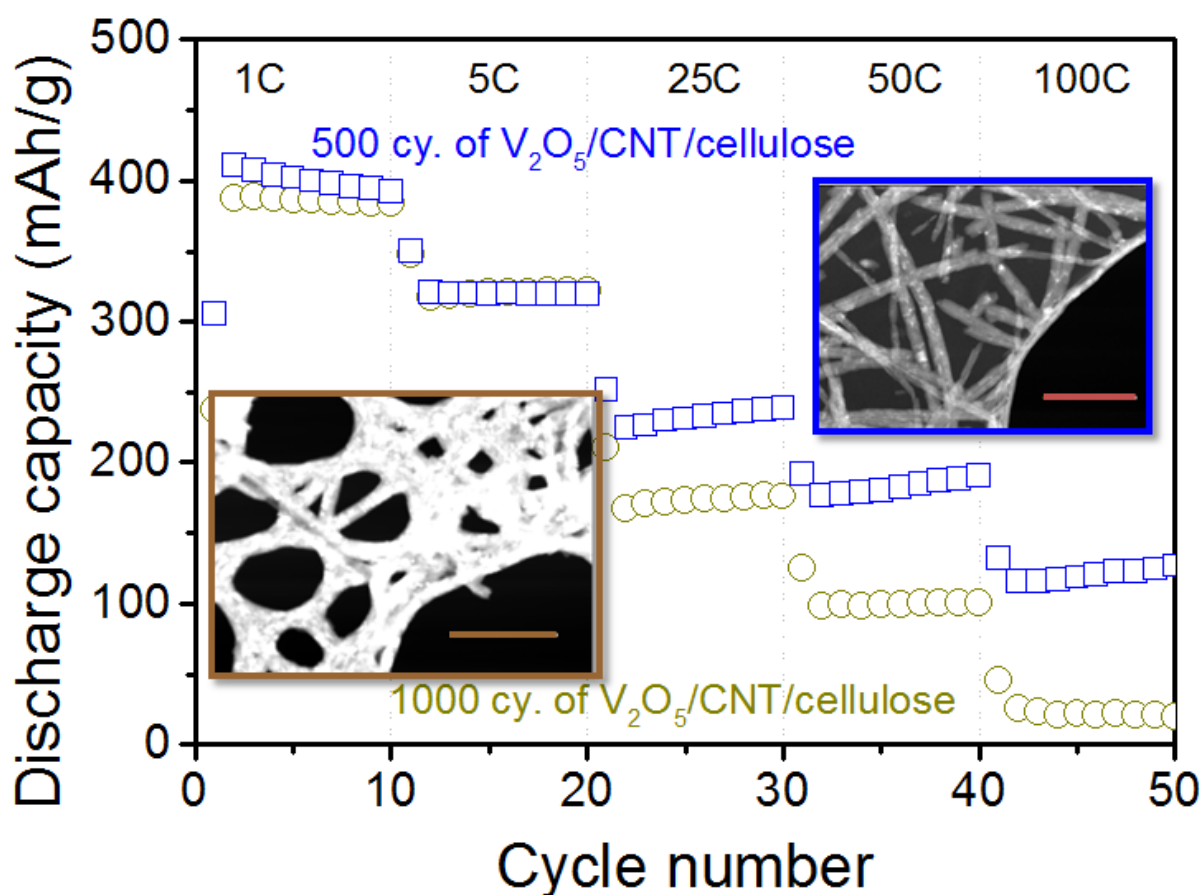

**Figure 1s:** Relationship of V<sub>2</sub>O<sub>5</sub> mass and electrode rate performance. The mass ratio of 500 and 1000 cycle ALD V<sub>2</sub>O<sub>5</sub> is about 5% and 10% of total electrode, respectively. Inset shows the dark field TEM images of 500 and 1000 cycle ALD V<sub>2</sub>O<sub>5</sub> on CNT. In dark field TEM, the brightness indicates heavy elements or thicker materials. Scale bar in the TEM is 500 nm.

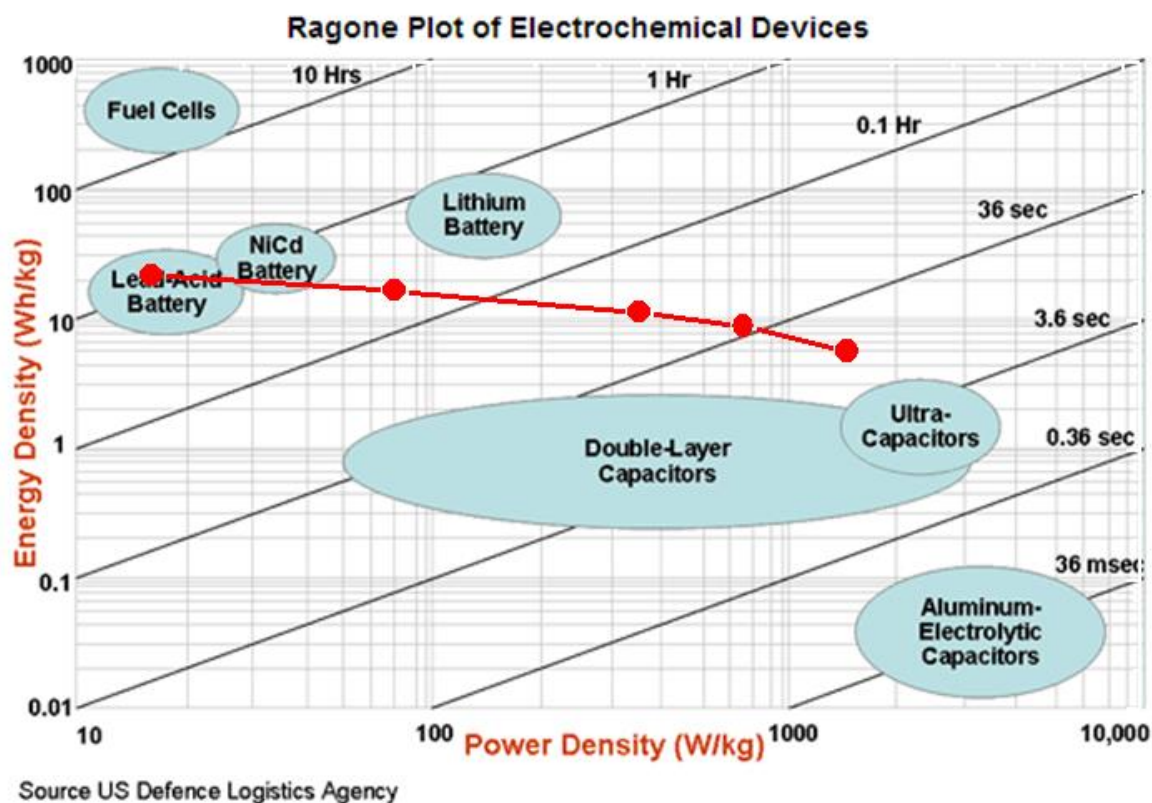

**Figure 2s:** Estimated device level performance of V<sub>2</sub>O<sub>5</sub>/CNT paper-electrodes (red dots) in the Ragone plot from US Defence Logistics Agency. Taking 5% mass ratio of V<sub>2</sub>O<sub>5</sub> over total cathode and assuming the cathode mass is 40% of total device, we estimate the device performance as 40% × 5% × active material V<sub>2</sub>O<sub>5</sub> performance.
